# Supplementary material
Source: PubMed Central journal article supplement (PMC2990520)
Supplement: mt2010185x5.pdf [file mt2010185x5.pdf]

## Supplementary Material

### Supplementary Material and Methods

#### Telomere length measurement by quantitative fluorescence in situ hybridization (Q-FISH)

Telomere length was analyzed by quantitative FISH performed by the molecular cytogenetics core facility in MD Anderson Cancer Center. Quantitative fluorescence in situ hybridization (Q-FISH) was performed with Cy-3–labeled (CCCTAA)<sub>3</sub> PNA probe and subsequent quantitative analysis of digital images. Briefly, slides were observed with an Axioplan microscope (Zeiss, Thornwood, NY) equipped with a charged coupled device (CCD) camera. Separate images were captured for DAPI (4,6 diamidino-2-phenylindole) and Cy-3 and subjected to telomere fluorescence measurements using TFL-Telo software. Individual telomere lengths were quantified by the level of fluorescence intensity of each telomere spot, expressed in telomere fluorescence units (TFUs).

#### Telomere length detection by quantitative real-time PCR

Genomic DNA was extracted from cells using QIAmp DNA blood mini kit (Qiagen) according to the manufacturer's instructions. Using quantitative real time PCR, relative telomere length (RTL) was calculated from the telomere repeat to single gene copy number ratio, using a modified version of the method described previously [48][49]. The single gene used was 36B4, encoding acidic ribosomal phosphoprotein P0. The assay was done on a high-throughput 96-well plate and was analyzed on a BioRad IQ5 real-time PCR detection system. Telomere and single gene copy amplifications were run separately, with a negative control (water) and a standard curve run on each plate. For each plate preparation, a master mix of SYBR Green qPCR SuperMix (Applied biosystems) was combined with either telomere or 36B4 primers. For each

20-uL reaction, 8 uL of DNA (0.4 ng/uL) was added to 10 uL of the master mix + 2 uL of primers. Telomere primer pairs were Tel 1 (5'-GGTTTTTGAGGGTGAGGGTGAGGGTGAGGGT-3'), Tel 2 (5'-TCCCGACTATCCCTATCCCTATCCCTATCCCTATCCCTA-3'), 36B4d (5'-CCATTCTATCATCAACGGGTACAA-3'), and 36B4u (5'-CAGCAAGTGGGAAGGTGTAATCC-3'). The thermal cycling profile for the telomere amplification was 95°C for 10 min followed by 35 cycles of 95°C for 15 s and 56°C for 1 min. For the 36B4 amplification, the profile was 95°C for 10 min followed by 40 cycles of 95°C for 15 s and 58°C for 1 min.

#### **Measurement of telomerase activity**

Telomerase activity of cultured cells was determined using the telomeric repeat amplification protocol (TRAP, TRAPeze telomerase detection kit; Chemicon, Billerica, MA) according to the manufacturer's instructions. In brief, T cells were suspended in CHAPS lysis buffer for 30 min on ice. The suspension was centrifuged at 12 000 g for 20 min. After determination of protein concentration, the cell extracts were incubated with TRAP buffer supplemented with dNTP mix, TS primer, TRAP primer mix and Taq polymerase (Invitrogen) in distilled water at 30°C for 30min and PCR was performed at 94°C for 30s, 50°C for 30s and 72°C for 90s for 34 cycles in a thermocycler (PTC-200, Peltier Thermal Cycler). PCR samples were run on a 12.5% (w/v) nondenaturing PAGE gel with 0.5 × TBE buffer for 2 h at 130 V. After electrophoresis, the gel was stained with SYBR<sup>®</sup> Green (Invitrogen) for 30 min and de-stained for 5 min at room temperature. The images were taken using a Kodak 2000R imaging system.

Figure S1. caAkt-transduced T cells maintained longer telomere length and increased telomerase activity in culture.

Figure S2. caAkt-T cells did not proliferate autonomously in the absence of prosurvival cytokines.

Figure S3. FoxP3 expression was reduced in caAkt-transduced CD4+CD25+ T regulatory cell.

Figure S4. Suppressive function was abrogated in caAkt transduced CD4+CD25+ T regulatory cells.

## References

1. Rooney, CM, *et al.* (1995). Use of gene-modified virus-specific T lymphocytes to control Epstein-Barr-virus-related lymphoproliferation. *Lancet* **345**: 9-13.
2. Riddell, SR, Walter, BA, Gilbert, MJ, and Greenberg, PD (1994). Selective reconstitution of CD8+ cytotoxic T lymphocyte responses in immunodeficient bone marrow transplant recipients by the adoptive transfer of T cell clones. *Bone Marrow Transplant* **14 Suppl 4**: S78-84.
3. Rooney, CM, *et al.* (1998). Infusion of cytotoxic T cells for the prevention and treatment of Epstein-Barr virus-induced lymphoma in allogeneic transplant recipients. *Blood* **92**: 1549-1555.
4. Straathof, KC, *et al.* (2005). Treatment of nasopharyngeal carcinoma with Epstein-Barr virus--specific T lymphocytes. *Blood* **105**: 1898-1904.
5. Dudley, ME, *et al.* (2005). Adoptive cell transfer therapy following non-myeloablative but lymphodepleting chemotherapy for the treatment of patients with refractory metastatic melanoma. *J Clin Oncol* **23**: 2346-2357.
6. Morgan, RA, *et al.* (2006). Cancer regression in patients after transfer of genetically engineered lymphocytes. *Science* **314**: 126-129.
7. Yee, C, *et al.* (2002). Adoptive T cell therapy using antigen-specific CD8+ T cell clones for the treatment of patients with metastatic melanoma: in vivo persistence, migration, and antitumor effect of transferred T cells. *Proc Natl Acad Sci U S A* **99**: 16168-16173.
8. Hahne, M, *et al.* (1996). Melanoma cell expression of Fas(Apo-1/CD95) ligand: implications for tumor immune escape. *Science* **274**: 1363-1366.
9. Thomas, DA, and Massague, J (2005). TGF-beta directly targets cytotoxic T cell functions during tumor evasion of immune surveillance. *Cancer Cell* **8**: 369-380.
10. Gorelik, L, and Flavell, RA (2001). Immune-mediated eradication of tumors through the blockade of transforming growth factor-beta signaling in T cells. *Nat Med* **7**: 1118-1122.
11. Dong, H, *et al.* (2002). Tumor-associated B7-H1 promotes T-cell apoptosis: a potential mechanism of immune evasion. *Nat Med* **8**: 793-800.
12. Iwai, Y, Ishida, M, Tanaka, Y, Okazaki, T, Honjo, T, and Minato, N (2002). Involvement of PD-L1 on tumor cells in the escape from host immune system and tumor immunotherapy by PD-L1 blockade. *Proc Natl Acad Sci U S A* **99**: 12293-12297.
13. Curiel, TJ, *et al.* (2004). Specific recruitment of regulatory T cells in ovarian carcinoma fosters immune privilege and predicts reduced survival. *Nat Med* **10**: 942-949.
14. Yu, P, *et al.* (2005). Intratumor depletion of CD4+ cells unmasks tumor immunogenicity leading to the rejection of late-stage tumors. *J Exp Med* **201**: 779-791.
15. Dotti, G, *et al.* (2005). Human cytotoxic T lymphocytes with reduced sensitivity to Fas-induced apoptosis. *Blood* **105**: 4677-4684.
16. Bollard, CM, *et al.* (2002). Adapting a transforming growth factor beta-related tumor protection strategy to enhance antitumor immunity. *Blood* **99**: 3179-3187.
17. Vera, JF, *et al.* (2009). Genetic manipulation of tumor-specific cytotoxic T lymphocytes to restore responsiveness to IL-7. *Mol Ther* **17**: 880-888.
18. Mehrotra, PT, Grant, AJ, and Siegel, JP (1995). Synergistic effects of IL-7 and IL-12 on human T cell activation. *J Immunol* **154**: 5093-5102.
19. Foster, AE, *et al.* (2007). Autologous designer antigen-presenting cells by gene modification of T lymphocyte blasts with IL-7 and IL-12. *J Immunother* **30**: 506-516.

20. Manning, BD, and Cantley, LC (2007). AKT/PKB signaling: navigating downstream. *Cell* **129**: 1261-1274.
21. Song, J, Lei, FT, Xiong, X, and Haque, R (2008). Intracellular signals of T cell costimulation. *Cell Mol Immunol* **5**: 239-247.
22. Wu, LX, *et al.* (2005). CD28 regulates the translation of Bcl-xL via the phosphatidylinositol 3-kinase/mammalian target of rapamycin pathway. *J Immunol* **174**: 180-194.
23. Schneider, H, Prasad, KV, Shoelson, SE, and Rudd, CE (1995). CTLA-4 binding to the lipid kinase phosphatidylinositol 3-kinase in T cells. *J Exp Med* **181**: 351-355.
24. Su, CC, *et al.* (2007). Phosphatidylinositol 3-kinase/Akt activation by integrin-tumor matrix interaction suppresses Fas-mediated apoptosis in T cells. *J Immunol* **179**: 4589-4597.
25. Hahnel, PS, Thaler, S, Antunes, E, Huber, C, Theobald, M, and Schuler, M (2008). Targeting AKT signaling sensitizes cancer to cellular immunotherapy. *Cancer Res* **68**: 3899-3906.
26. Wohlfert, EA, and Clark, RB (2007). 'Vive la Resistance!'--the PI3K-Akt pathway can determine target sensitivity to regulatory T cell suppression. *Trends Immunol* **28**: 154-160.
27. Park, D, Lapteva, N, Seethammagari, M, Slawin, KM, and Spencer, DM (2006). An essential role for Akt1 in dendritic cell function and tumor immunotherapy. *Nat Biotechnol* **24**: 1581-1590.
28. Kojima, H, Kanno, Y, Hase, H, and Kobata, T (2005). CD4+CD25+ regulatory T cells attenuate the phosphatidylinositol 3-kinase/Akt pathway in antigen-primed immature CD8+ CTLs during functional maturation. *J Immunol* **174**: 5959-5967.
29. Liu, VC, *et al.* (2007). Tumor evasion of the immune system by converting CD4+CD25- T cells into CD4+CD25+ T regulatory cells: role of tumor-derived TGF-beta. *J Immunol* **178**: 2883-2892.
30. Sauer, S, *et al.* (2008). T cell receptor signaling controls Foxp3 expression via PI3K, Akt, and mTOR. *Proc Natl Acad Sci U S A* **105**: 7797-7802.
31. Haxhinasto, S, Mathis, D, and Benoist, C (2008). The AKT-mTOR axis regulates de novo differentiation of CD4+Foxp3+ cells. *J Exp Med* **205**: 565-574.
32. Rossig, C, Bollard, CM, Nuchtern, JG, Merchant, DA, and Brenner, MK (2001). Targeting of G(D2)-positive tumor cells by human T lymphocytes engineered to express chimeric T-cell receptor genes. *Int J Cancer* **94**: 228-236.
33. Pule, MA, Straathof, KC, Dotti, G, Heslop, HE, Rooney, CM, and Brenner, MK (2005). A chimeric T cell antigen receptor that augments cytokine release and supports clonal expansion of primary human T cells. *Mol Ther* **12**: 933-941.
34. Straathof, KC, Spencer, DM, Sutton, RE, and Rooney, CM (2003). Suicide genes as safety switches in T lymphocytes. *Cytotherapy* **5**: 227-230.
35. Ramos, CA, *et al.* An inducible caspase 9 suicide gene to improve the safety of mesenchymal stromal cell therapies. *Stem Cells* **28**: 1107-1115.
36. Strand, S, *et al.* (1996). Lymphocyte apoptosis induced by CD95 (APO-1/Fas) ligand-expressing tumor cells--a mechanism of immune evasion? *Nat Med* **2**: 1361-1366.
37. Poppema, S, Potters, M, Visser, L, and van den Berg, AM (1998). Immune escape mechanisms in Hodgkin's disease. *Ann Oncol* **9 Suppl 5**: S21-24.

38. Rooney, CM, *et al.* (2002). Immunotherapy for Hodgkin's disease. *Ann Hematol* **81 Suppl 2**: S39-42.
39. Piccirillo, CA, and Shevach, EM (2001). Cutting edge: control of CD8+ T cell activation by CD4+CD25+ immunoregulatory cells. *J Immunol* **167**: 1137-1140.
40. Plunkett, FJ, *et al.* (2007). The loss of telomerase activity in highly differentiated CD8+CD28-CD27- T cells is associated with decreased Akt (Ser473) phosphorylation. *J Immunol* **178**: 7710-7719.
41. Remy, I, Montmarquette, A, and Michnick, SW (2004). PKB/Akt modulates TGF-beta signalling through a direct interaction with Smad3. *Nat Cell Biol* **6**: 358-365.
42. Lin, SJ, Chang, C, Ng, AK, Wang, SH, Li, JJ, and Hu, CP (2007). Prevention of TGF-beta-induced apoptosis by interleukin-4 through Akt activation and p70S6K survival signaling pathways. *Apoptosis* **12**: 1659-1670.
43. Battaglia, M, Stabilini, A, and Roncarolo, MG (2005). Rapamycin selectively expands CD4+CD25+FoxP3+ regulatory T cells. *Blood* **105**: 4743-4748.
44. Crellin, NK, Garcia, RV, and Levings, MK (2007). Altered activation of AKT is required for the suppressive function of human CD4+CD25+ T regulatory cells. *Blood* **109**: 2014-2022.
45. Pierau, M, Engelmann, S, Reinhold, D, Lapp, T, Schraven, B, and Bommhardt, UH (2009). Protein kinase B/Akt signals impair Th17 differentiation and support natural regulatory T cell function and induced regulatory T cell formation. *J Immunol* **183**: 6124-6134.
46. Greenberg, PD (1991). Adoptive T cell therapy of tumors: mechanisms operative in the recognition and elimination of tumor cells. *Adv Immunol* **49**: 281-355.
47. Fujio, Y, and Walsh, K (1999). Akt mediates cytoprotection of endothelial cells by vascular endothelial growth factor in an anchorage-dependent manner. *J Biol Chem* **274**: 16349-16354.
48. Cawthon, RM (2002). Telomere measurement by quantitative PCR. *Nucleic Acids Res* **30**: e47.
49. Gramatges, MM, Telli, ML, Balise, R, and Ford, JM. Longer relative telomere length in blood from women with sporadic and familial breast cancer compared with healthy controls. *Cancer Epidemiol Biomarkers Prev* **19**: 605-613.
