# Supplementary material
Source: PubMed Central journal article supplement (PMC2990520)

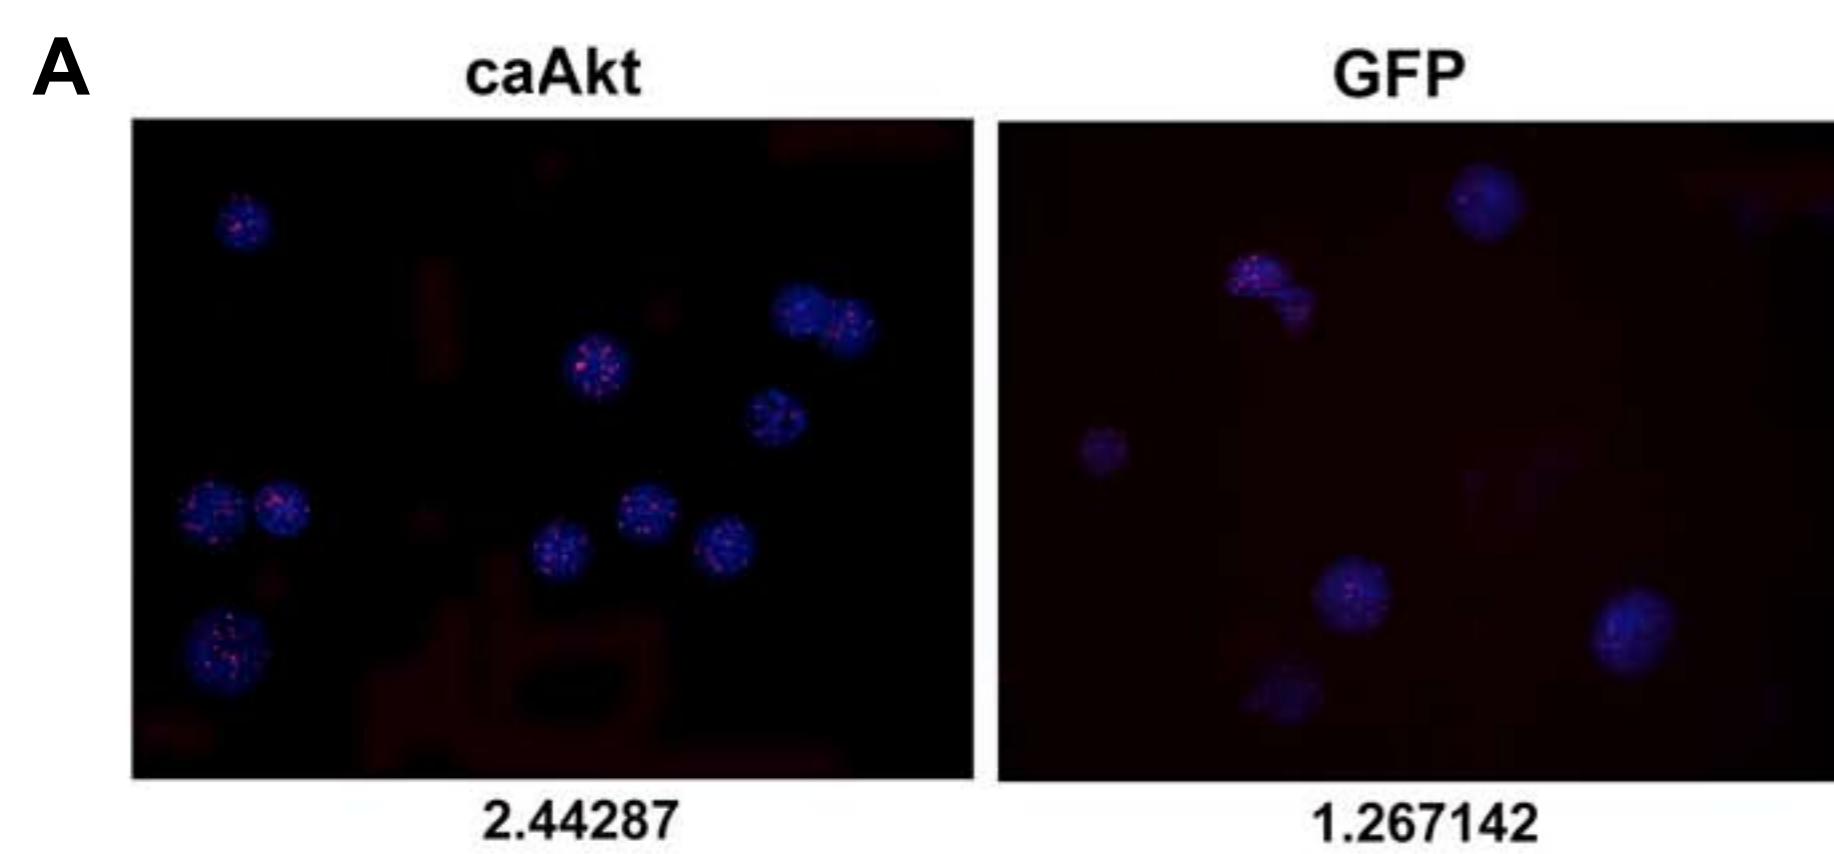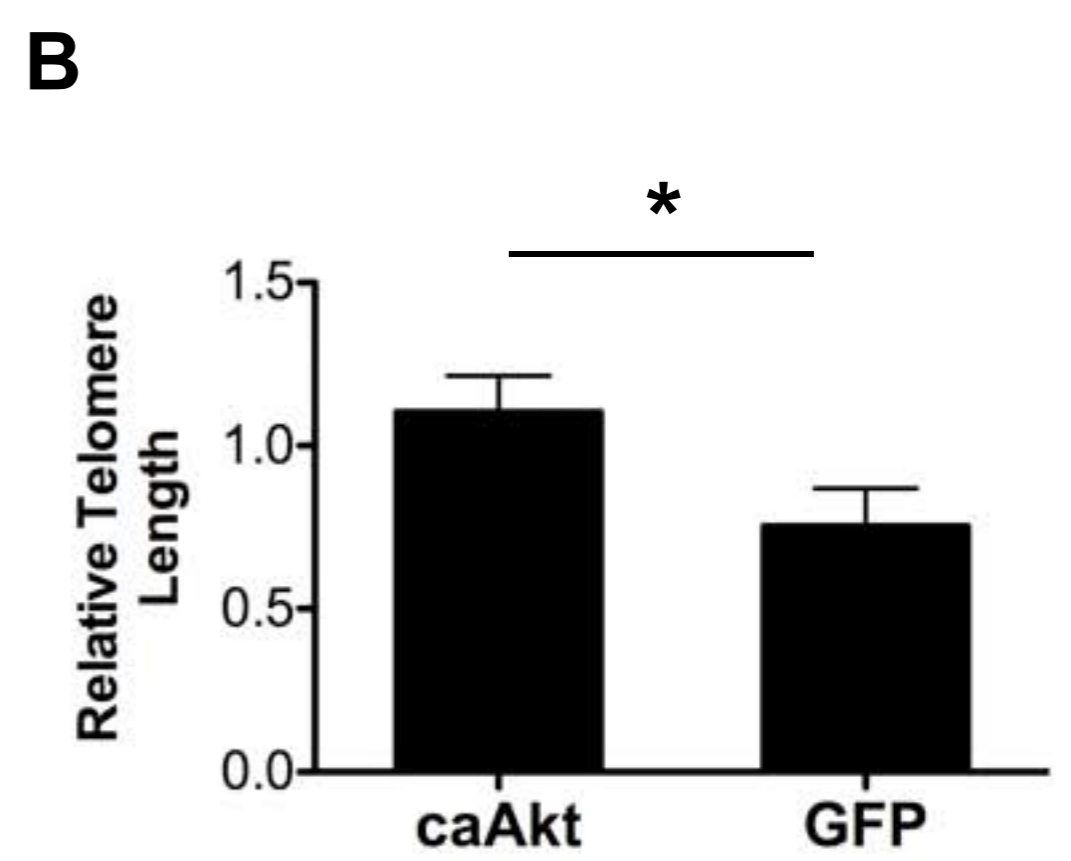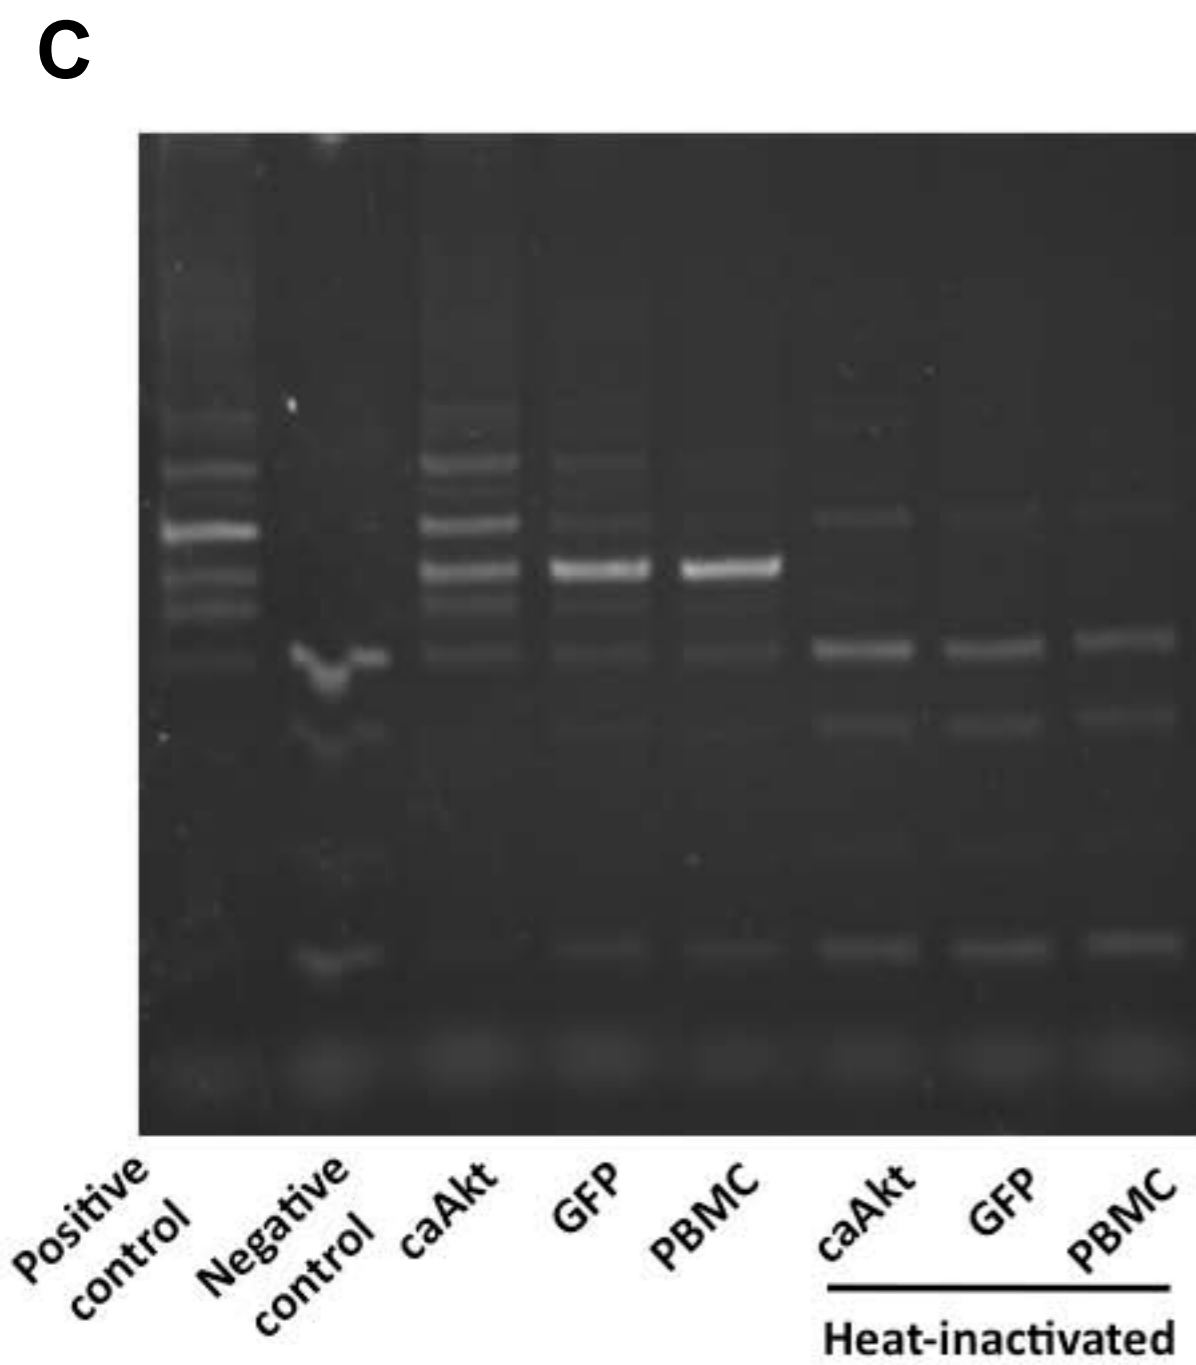

Supplementary Figure 1

Supplement: mt2010185x1.pdf [file mt2010185x1.pdf]

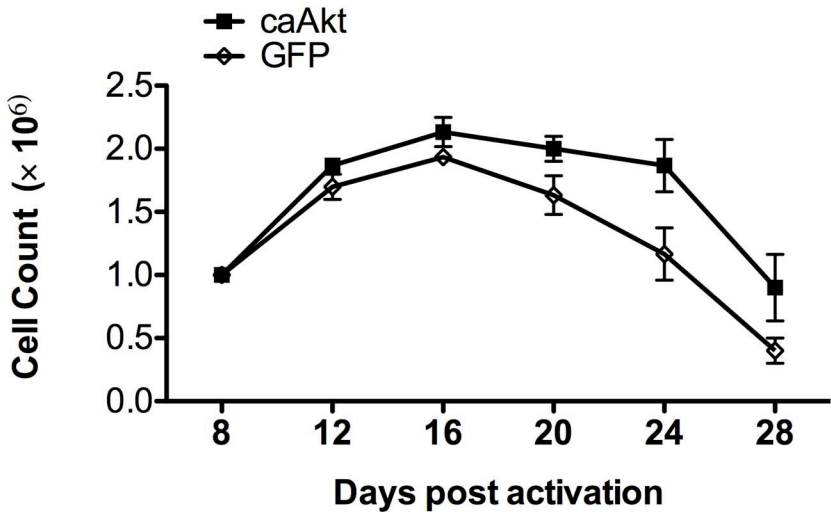

Supplementary Figure 2

Supplement: mt2010185x2.pdf [file mt2010185x2.pdf]

GFP

caAkt

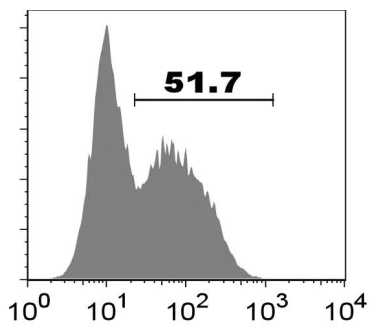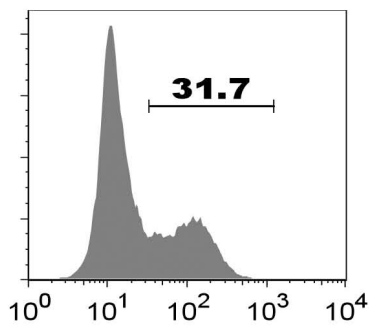

FoxP3

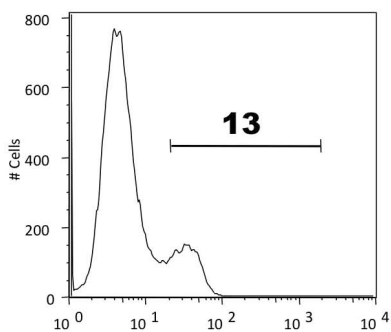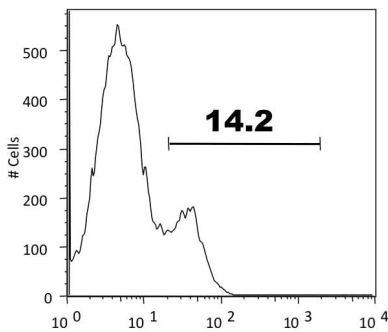

GATA-3

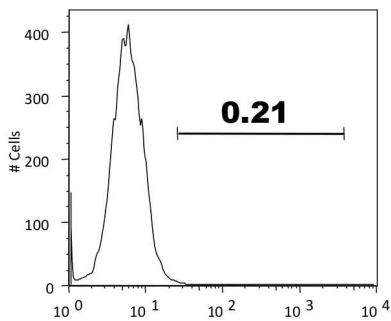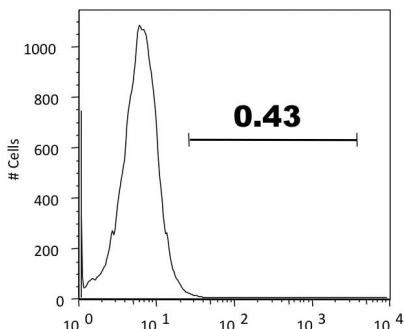

T-bet

Supplement: mt2010185x3.pdf [file mt2010185x3.pdf]

A

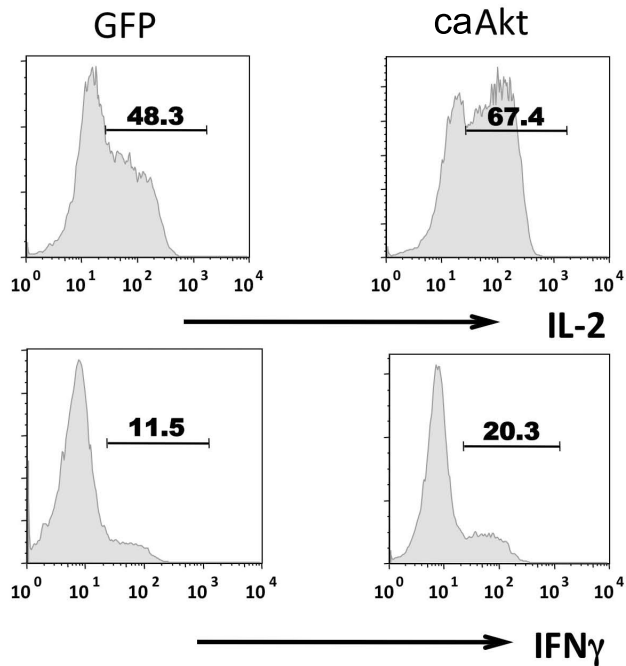

B

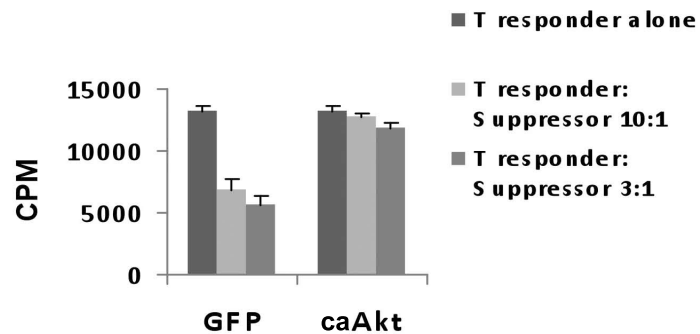

Supplement: mt2010185x4.pdf [file mt2010185x4.pdf]
